# Supplementary material for: Expanding our Understanding of Sequence-Function Relationships of Type II Polyketide Biosynthetic Gene Clusters: Bioinformatics-Guided Identification of Frankiamicin A from Frankia sp. EAN1pec
Source: PubMed Central journal article supplement (PMC4383371; doi:10.1371/journal.pone.0121505), 2015-04-02

Figure S1. Schematic summary of *Dynamite* workflow used in this study.

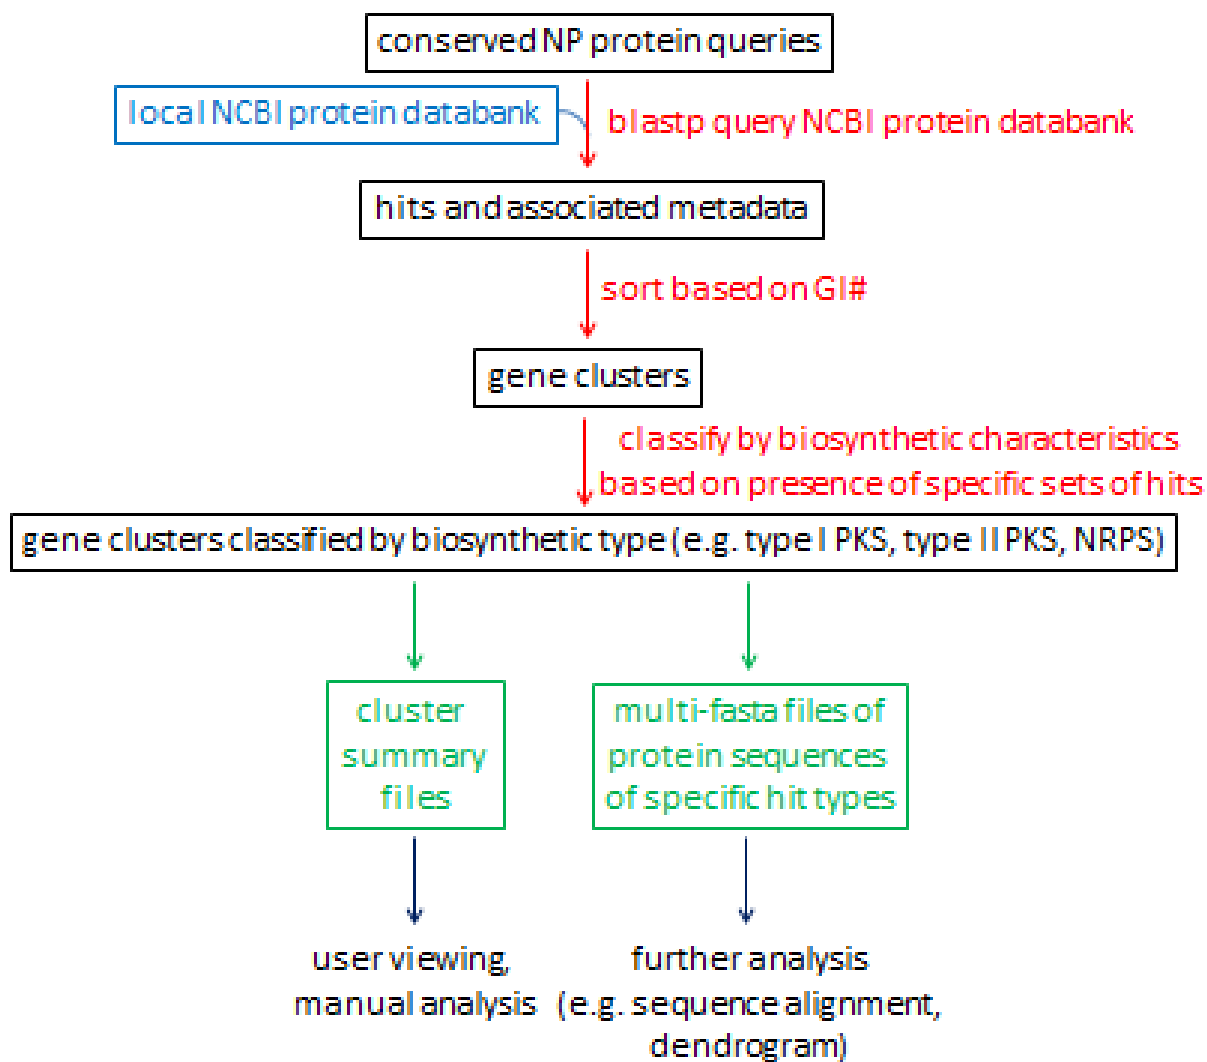

Supplement: pone.0121505.s001.pdf [file pone.0121505.s001.pdf]
