# Supplementary material for: Expanding our Understanding of Sequence-Function Relationships of Type II Polyketide Biosynthetic Gene Clusters: Bioinformatics-Guided Identification of Frankiamicin A from Frankia sp. EAN1pec
Source: PubMed Central journal article supplement (PMC4383371; doi:10.1371/journal.pone.0121505), 2015-04-02
Supplement: pone.0121505.s002.pdf [file pone.0121505.s002.pdf]

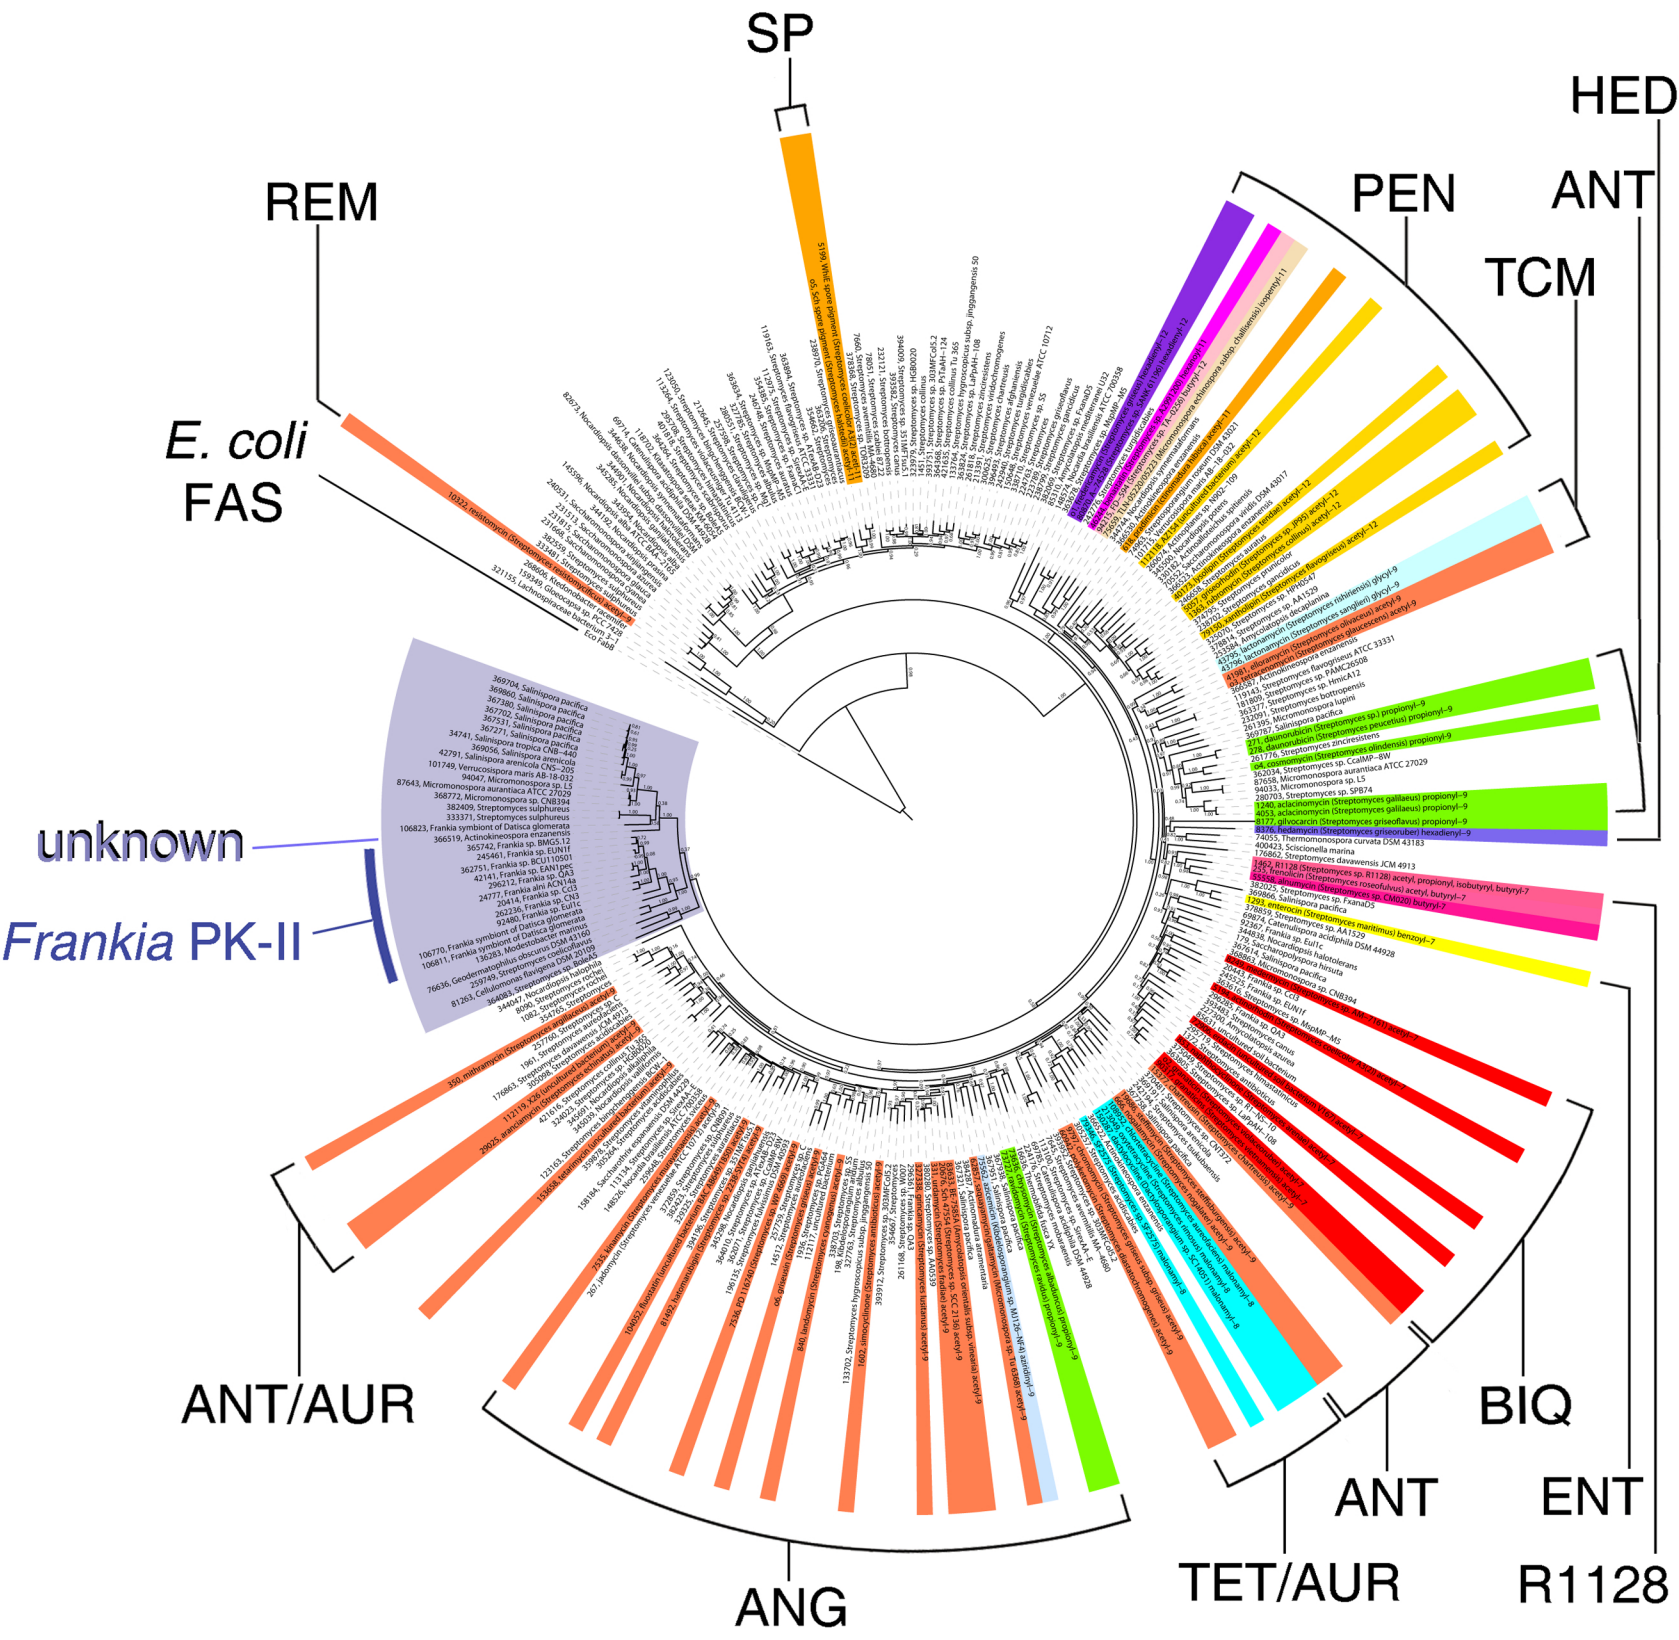

- |                                                                                                                                                              |                                                                                                                                                                 |                                                                                                                                                                                          |
|--------------------------------------------------------------------------------------------------------------------------------------------------------------|-----------------------------------------------------------------------------------------------------------------------------------------------------------------|------------------------------------------------------------------------------------------------------------------------------------------------------------------------------------------|
| <span style="display: inline-block; width: 15px; height: 15px; background-color: #e67e22; border: 1px solid black; margin-right: 5px;"></span> acetyl-9      | <span style="display: inline-block; width: 15px; height: 15px; background-color: #f1c40f; border: 1px solid black; margin-right: 5px;"></span> methylbutyryl-12 | <span style="display: inline-block; width: 15px; height: 15px; background-color: #e91e63; border: 1px solid black; margin-right: 5px;"></span> acetyl, butyryl-7                         |
| <span style="display: inline-block; width: 15px; height: 15px; background-color: #f1c40f; border: 1px solid black; margin-right: 5px;"></span> acetyl-11     | <span style="display: inline-block; width: 15px; height: 15px; background-color: #a2d2c2; border: 1px solid black; margin-right: 5px;"></span> glycyl-9         | <span style="display: inline-block; width: 15px; height: 15px; background-color: #e91e63; border: 1px solid black; margin-right: 5px;"></span> acetyl-, propionyl, isobutyryl, butyryl-7 |
| <span style="display: inline-block; width: 15px; height: 15px; background-color: #f1c40f; border: 1px solid black; margin-right: 5px;"></span> acetyl-12     | <span style="display: inline-block; width: 15px; height: 15px; background-color: #00bcd4; border: 1px solid black; margin-right: 5px;"></span> malonamyl-8      | <span style="display: inline-block; width: 15px; height: 15px; background-color: #e91e63; border: 1px solid black; margin-right: 5px;"></span> butyryl-7                                 |
| <span style="display: inline-block; width: 15px; height: 15px; background-color: #9c27b0; border: 1px solid black; margin-right: 5px;"></span> hexadienyl-12 | <span style="display: inline-block; width: 15px; height: 15px; background-color: #673ab7; border: 1px solid black; margin-right: 5px;"></span> hexadienyl-9     | <span style="display: inline-block; width: 15px; height: 15px; background-color: #e91e63; border: 1px solid black; margin-right: 5px;"></span> acetyl-7                                  |
| <span style="display: inline-block; width: 15px; height: 15px; background-color: #9c27b0; border: 1px solid black; margin-right: 5px;"></span> hexanoyl-11   | <span style="display: inline-block; width: 15px; height: 15px; background-color: #8bc34a; border: 1px solid black; margin-right: 5px;"></span> propionyl-9      | <span style="display: inline-block; width: 15px; height: 15px; background-color: #a1887f; border: 1px solid black; margin-right: 5px;"></span> aziridinyl-7                              |
| <span style="display: inline-block; width: 15px; height: 15px; background-color: #f08080; border: 1px solid black; margin-right: 5px;"></span> butyryl-12    | <span style="display: inline-block; width: 15px; height: 15px; background-color: #f1c40f; border: 1px solid black; margin-right: 5px;"></span> benzoyl-7        |                                                                                                                                                                                          |
