# Supplementary material for: Expanding our Understanding of Sequence-Function Relationships of Type II Polyketide Biosynthetic Gene Clusters: Bioinformatics-Guided Identification of Frankiamicin A from Frankia sp. EAN1pec
Source: PubMed Central journal article supplement (PMC4383371; doi:10.1371/journal.pone.0121505), 2015-04-02
Supplement: pone.0121505.s009.pdf [file pone.0121505.s009.pdf]

**Table S1.** List of ketosynthase  $\alpha/\beta$  genes used to construct the dendrogram shown in Figure 3; and associated metadata.

| PKS_Cluster_ID | Strain name                                                    | Compound name           | starter unit - number of cycles          | NCBI gi K $\alpha$ | NCBI gi K $\beta$ |
|----------------|----------------------------------------------------------------|-------------------------|------------------------------------------|--------------------|-------------------|
| 179            | <i>Saccharopolyspora hirsuta</i>                               |                         |                                          | 347180             | 347181            |
| 198            | <i>Kibdelosporangium aridum</i>                                |                         |                                          | 406081             | 406082            |
| 255            | <i>Streptomyces roseofulvus</i>                                | frenolicin              | acetyl, butyryl-7                        | 487889             | 487890            |
| 267            | <i>Streptomyces venezuelae</i> ATCC 10712                      | jadomycin               | acetyl-9                                 | 510722             | 510723            |
| 271            | <i>Streptomyces</i> sp.                                        | daunorubicin            | propionyl-9                              | 516109             | 516110            |
| 278            | <i>Streptomyces peucetius</i>                                  | daunorubicin            | propionyl-9                              | 532245             | 532246            |
| 331            | <i>Streptomyces fradiae</i>                                    | urdamycin               | acetyl-9                                 | 809105             | 809106            |
| 350            | <i>Streptomyces argillaceus</i>                                | mithramycin             | acetyl-9                                 | 927517             | 927518            |
| 618            | <i>Actinomadura hibisca</i>                                    | pradimicin              | acetyl-11                                | 2580442            | 2580443           |
| 666            | <i>Streptomyces nogalater</i>                                  | nogalamycin             | acetyl-9                                 | 2916812            | 2916813           |
| 840            | <i>Streptomyces cyanogenus</i>                                 | landomycin              | acetyl-9                                 | 4240405            | 4240406           |
| 853            | <i>Streptomyces arenae</i>                                     | naphthocyclinone        | acetyl-7                                 | 4416222            | 4416223           |
| 1082           | <i>Streptomyces rochei</i>                                     |                         |                                          | 6518511            | 6518512           |
| 1240           | <i>Streptomyces galliaeus</i>                                  | aclacinomycin           | propionyl-9                              | 7800665            | 7800666           |
| 1293           | <i>Streptomyces maritimus</i>                                  | enterocin               | benzoyl-7                                | 8926190            | 8926191           |
| 1363           | <i>Streptomyces collinus</i>                                   | rubromycin              | acetyl-12                                | 9944994            | 9944995           |
| 1372           | <i>Streptomyces antibioticus</i>                               |                         |                                          | 9967595            | 9967596           |
| 1451           | <i>Streptomyces collinus</i>                                   |                         |                                          | 11024335           | 11024336          |
| 1462           | <i>Streptomyces</i> sp. R1128                                  | R1128                   | acetyl, propionyl, isobutyryl, butyryl-7 | 11096114           | 11096113          |
| 1602           | <i>Streptomyces antibioticus</i>                               | simocyclinone           | acetyl-9                                 | 12744820           | 12744821          |
| 1936           | <i>Streptomyces</i> sp. PGA64                                  |                         |                                          | 14280343           | 14280344          |
| 1961           | <i>Streptomyces aureofaciens</i>                               |                         |                                          | 14486277           | 14486278          |
| 4053           | <i>Streptomyces galliaeus</i>                                  | aclacinomycin           | propionyl-9                              | 16945714           | 16945715          |
| 5057           | <i>Streptomyces</i> sp. JP95                                   | griseorhodin            | acetyl-12                                | 21039488           | 21039489          |
| 5194           | <i>Streptomyces coelicolor</i> A3(2)                           | actinorhodin            | acetyl-7                                 | 21223458           | 21223459          |
| 5199           | <i>Streptomyces coelicolor</i> A3(2)                           | WhiE spore pigment      | acetyl-11                                | 21223681           | 21223680          |
| 7535           | <i>Streptomyces murayamaensis</i>                              | kinamycin               | acetyl-9                                 | 29469233           | 29469234          |
| 7536           | <i>Streptomyces</i> sp. WP 4669                                | PD 116740               | acetyl-9                                 | 29469252           | 29469253          |
| 7645           | <i>Streptomyces avermitilis</i> MA-4680                        |                         |                                          | 29828918           | 29828917          |
| 7660           | <i>Streptomyces avermitilis</i> MA-4680                        |                         |                                          | 29829380           | 29829381          |
| 8090           | <i>Streptomyces rochei</i>                                     |                         |                                          | 30795041           | 30795040          |
| 8177           | <i>Streptomyces griseoflavus</i>                               | gilvocarcin             | propionyl-9                              | 32140283           | 32140284          |
| 8249           | <i>Streptomyces</i> sp. AM-7161                                | medermycin              | acetyl-7                                 | 32469270           | 32469271          |
| 8376           | <i>Streptomyces griseoruber</i>                                | hedamycin               | hexadienyl-9                             | 32492544           | 32492543          |
| 9797           | <i>Streptomyces griseus</i> subsp. <i>griseus</i>              | chromomycin             | acetyl-9                                 | 40644834           | 40644833          |
| 10322          | <i>Streptomyces resistomycificus</i>                           | resistomycin            | acetyl-9                                 | 45259316           | 45259317          |
| 14512          | <i>Streptomyces aureofaciens</i>                               |                         |                                          | 61968692           | 61968693          |
| 15377          | <i>Streptomyces chartreusis</i>                                | chartreusin             | acetyl-9                                 | 68146474           | 68146475          |
| 16636          | <i>Thermobifida fusca</i> YX                                   |                         |                                          | 72161622           | 72161623          |
| 19686          | <i>Streptomyces steffisburgensis</i>                           | steffimycin             | acetyl-9                                 | 84619196           | 84619195          |
| 20414          | <i>Frankia</i> sp. Ccl3                                        |                         |                                          | 86741538           | 86741537          |
| 20443          | <i>Frankia</i> sp. Ccl3                                        |                         |                                          | 86742778           | 86742777          |
| 20676          | <i>Streptomyces</i> sp. SCC 2136                               | Sch 47554               | acetyl-9                                 | 88319793           | 88319792          |
| 24777          | <i>Frankia alni</i> ACN14a                                     |                         |                                          | 111223784          | 111223783         |
| 29025          | <i>Streptomyces echinatus</i>                                  | aranciamycin            | acetyl-9                                 | 118722503          | 118722502         |
| 34741          | <i>Salinispora tropica</i> CNB-440                             |                         |                                          | 145595027          | 145595026         |
| 40173          | <i>Streptomyces tendae</i>                                     | lysolipin               | acetyl-12                                | 154623217          | 154623216         |
| 41981          | <i>Streptomyces olivaceus</i>                                  | elloramycin             | acetyl-9                                 | 158148282          | 158148283         |
| 42141          | <i>Frankia</i> sp. EAN1pec                                     |                         |                                          | 158314223          | 158314224         |
| 42791          | <i>Salinispora arenicola</i> CNS-205                           |                         |                                          | 159038259          | 159038258         |
| 43795          | <i>Streptomyces rishiriensis</i>                               | lactonamycin            | glycyl-9                                 | 161367388          | 161367389         |
| 43796          | <i>Streptomyces sanglieri</i>                                  | lactonamycin            | glycyl-9                                 | 161367423          | 161367424         |
| 46244          | <i>Streptomyces</i> sp. A2991200                               | benastatin              | hexanoyl-11                              | 169402965          | 169402966         |
| 55558          | <i>Streptomyces</i> sp. CM020                                  | alnumycin               | butyryl-7                                | 209863916          | 209863917         |
| 60942          | <i>Streptomyces diastatochromogenes</i>                        | polyketomycin           | acetyl-9                                 | 224812396          | 224812397         |
| 62857          | <i>Micromonospora</i> sp. Tu 6368                              | saquayamycin/galtamycin | acetyl-9                                 | 227121321          | 227121322         |
| 69714          | <i>Catenulispora acidiphila</i> DSM 44928                      |                         |                                          | 256390289          | 256390290         |
| 69785          | <i>Catenulispora acidiphila</i> DSM 44928                      |                         |                                          | 256392728          | 256392729         |
| 69874          | <i>Catenulispora acidiphila</i> DSM 44928                      |                         |                                          | 256395612          | 256395613         |
| 70552          | <i>Saccharomonospora viridis</i> DSM 43017                     |                         |                                          | 257057328          | 257057329         |
| 72906          | uncultured soil bacterium V167                                 | erdacin                 | acetyl-7                                 | 261497157          | 261497158         |
| 73636          | <i>Streptomyces albaduncus</i>                                 | chrysomycin             | propionyl-9                              | 266631088          | 266631089         |
| 73727          | <i>Streptomyces ravidus</i>                                    | ravidomycin             | propionyl-9                              | 268322287          | 268322286         |
| 74055          | <i>Thermomonospora curvata</i> DSM 43183                       |                         |                                          | 269126987          | 269126986         |
| 74963          | <i>Streptosporangium roseum</i> DSM 43021                      |                         |                                          | 271965601          | 271965602         |
| 75562          | <i>Kibdelosporangium</i> sp. MJ126-NF4                         | azicemicin              | aziridinyl-9                             | 282801740          | 282801741         |
| 75659          | <i>Micromonospora echinospora</i> subsp. <i>challensis</i>     | TLN-05220/TLN-05223     | 2-methylbutyryl-12                       | 283484105          | 283484106         |
| 76636          | <i>Geodermatophilus obscurus</i> DSM 43160                     |                         |                                          | 284988769          | 284988768         |
| 78051          | <i>Streptomyces scabiei</i> 87.22                              |                         |                                          | 290958762          | 290958763         |
| 79150          | <i>Streptomyces flavogriseus</i>                               | xantholipin             | acetyl-12                                | 292386134          | 292386133         |
| 79346          | <i>Streptomyces</i> sp. SF2575                                 | SF2575                  | malonamyl-8                              | 292659136          | 292659137         |
| 80870          | <i>Streptomyces</i> sp. SANK 61196                             | A-74528                 | hexadienyl-12                            | 296046088          | 296046089         |
| 81263          | <i>Cellulomonas flavigena</i> DSM 20109                        |                         |                                          | 296131162          | 296131163         |
| 81492          | <i>Streptomyces</i> sp. 2238-SVT4                              | hatomarubigin           | acetyl-9                                 | 296178419          | 296178421         |
| 82673          | <i>Nocardopsis dassonvillei</i> subsp. <i>dassonvillei</i> DSM |                         |                                          | 297563194          | 297563193         |
| 83633          | <i>Amycolatopsis orientalis</i> subsp. <i>vinearia</i>         | BE-7585A                | acetyl-9                                 | 298256334          | 298256335         |
| 85310          | <i>Amycolatopsis mediterranei</i> U32                          |                         |                                          | 300787306          | 300787305         |
| 85631          | uncultured soil bacterium                                      |                         |                                          | 301057030          | 301057029         |
| 87643          | <i>Micromonospora aurantiaca</i> ATCC 27029                    |                         |                                          | 302867962          | 302867961         |
| 87658          | <i>Micromonospora aurantiaca</i> ATCC 27029                    |                         |                                          | 302868481          | 302868480         |
| 90317          | <i>Streptomyces vietnamensis</i>                               | granaticins             | acetyl-7                                 | 308445212          | 308445213         |
| 92367          | <i>Frankia</i> sp. Eu1c                                        |                         |                                          | 312195193          | 312195194         |
| 92480          | <i>Frankia</i> sp. Eu1c                                        |                         |                                          | 312198553          | 312198552         |
| 94033          | <i>Micromonospora</i> sp. L5                                   |                         |                                          | 315505143          | 315505144         |
| 94047          | <i>Micromonospora</i> sp. L5                                   |                         |                                          | 315505638          | 315505639         |
| 94215          | <i>Streptomyces</i> sp. TA-0256                                | FD-594                  | butyryl-12                               | 316997093          | 316997094         |

|        |                                                    |                   |             |           |           |
|--------|----------------------------------------------------|-------------------|-------------|-----------|-----------|
| 101715 | Verrucosipora maris AB-18-032                      |                   |             | 330467594 | 330467593 |
| 101749 | Verrucosipora maris AB-18-032                      |                   |             | 330468706 | 330468705 |
| 104052 | uncultured bacterium BAC AB649/1850                | fluostatin        | acetyl-9    | 332380592 | 332380591 |
| 106770 | Frankia symbiont of Datisca glomerata              |                   |             | 336176581 | 336176580 |
| 106811 | Frankia symbiont of Datisca glomerata              |                   |             | 336178278 | 336178279 |
| 106823 | Frankia symbiont of Datisca glomerata              |                   |             | 336178651 | 336178650 |
| 108952 | Streptomyces aureofaciens                          | chlortetracycline | malonamyl-8 | 338776764 | 338776763 |
| 112117 | uncultured bacterium                               |                   |             | 343479049 | 343479050 |
| 112118 | uncultured bacterium                               | AZ154             | acetyl-12   | 343479100 | 343479099 |
| 112119 | uncultured bacterium                               | X26               | acetyl-9    | 343479142 | 343479141 |
| 112975 | Streptomyces sp. SirexAA-E                         |                   |             | 344997887 | 344997886 |
| 113100 | Streptomyces sp. SirexAA-E                         |                   |             | 345002705 | 345002706 |
| 113134 | Streptomyces sp. SirexAA-E                         |                   |             | 345003803 | 345003804 |
| 113264 | Streptomyces violaceusniger Tu 4113                |                   |             | 345010189 | 345010188 |
| 118702 | Kitasatospora setae KM-6054                        |                   |             | 357394114 | 357394115 |
| 119143 | Streptomyces flavogriseus ATCC 33331               |                   |             | 357414496 | 357414495 |
| 119163 | Streptomyces flavogriseus ATCC 33331               |                   |             | 357415186 | 357415187 |
| 123050 | Streptomyces bingchenggensis BCW-1                 |                   |             | 374985521 | 374985522 |
| 123163 | Streptomyces bingchenggensis BCW-1                 |                   |             | 374989600 | 374989601 |
| 133702 | Streptomyces hygroscopicus subsp. jinggangensis 50 |                   |             | 386837281 | 386837280 |
| 133764 | Streptomyces hygroscopicus subsp. jinggangensis 50 |                   |             | 386839769 | 386839768 |
| 136283 | Modestobacter marinus                              |                   |             | 389861877 | 389861876 |
| 145596 | Nocardiosis alba ATCC BAA-2165                     |                   |             | 403508105 | 403508106 |
| 148526 | Nocardia brasiliensis ATCC 700358                  |                   |             | 407642667 | 407642668 |
| 148574 | Nocardia brasiliensis ATCC 700358                  |                   |             | 407644198 | 407644199 |
| 150287 | Dactylosporangium sp. SC14051                      | dactylacycline    | malonamyl-8 | 408451285 | 408451286 |
| 150648 | Streptomyces venezuelae ATCC 10712                 |                   |             | 408682514 | 408682513 |
| 153658 | uncultured bacterium                               | tetarimycin       | acetyl-9    | 426272821 | 426272820 |
| 158184 | Saccharothrix espanaensis DSM 44229                |                   |             | 433607249 | 433607250 |
| 159349 | Gloeocapsa sp. PCC 7428                            |                   |             | 434395464 | 434395463 |
| 176862 | Streptomyces davawensis JCM 4913                   |                   |             | 471321947 | 471321946 |
| 176863 | Streptomyces davawensis JCM 4913                   |                   |             | 471321991 | 471321990 |
| 181809 | Streptomyces sp. PAMC26508                         |                   |             | 479318246 | 479318247 |
| 196135 | Streptomyces fulvissimus DSM 40593                 |                   |             | 488611453 | 488611454 |
| 212645 | Streptomyces clavuligerus                          |                   |             | 294328345 | 294328346 |
| 213049 | Streptomyces rimosus                               | oxytetracycline   | malonamyl-8 | 440620236 | 440620260 |
| 213391 | Streptomyces viridochromogenes                     |                   |             | 302471833 | 302471834 |
| 223789 | Streptomyces griseoflavus                          |                   |             | 302474694 | 302474695 |
| 224176 | Streptomyces mobaraensis                           |                   |             | 453051297 | 453051296 |
| 224763 | Streptomyces                                       |                   |             | 291344118 | 291344117 |
| 227300 | Amycolatopsis azurea                               |                   |             | 449420704 | 449420705 |
| 231513 | Saccharomonospora azurea                           |                   |             | 359738726 | 359738725 |
| 231668 | Saccharomonospora cyanea                           |                   |             | 374661362 | 374661363 |
| 231815 | Saccharomonospora glauca                           |                   |             | 384521847 | 384521848 |
| 232091 | Streptomyces bottropensis                          |                   |             | 456387833 | 456387834 |
| 232121 | Streptomyces bottropensis                          |                   |             | 456387348 | 456387347 |
| 238702 | Streptomyces gancidicus                            |                   |             | 455651441 | 455651440 |
| 238799 | Streptomyces gancidicus                            |                   |             | 455647826 | 455647827 |
| 238970 | Streptomyces griseoaurantiacus                     |                   |             | 329303135 | 329303134 |
| 240531 | Saccharomonospora xinjiangensis                    |                   |             | 383464465 | 383464464 |
| 242194 | Streptomyces tsukubaensis                          |                   |             | 385668968 | 385668967 |
| 242776 | Streptomyces turgidiscabies                        |                   |             | 440283088 | 440283085 |
| 242940 | Streptomyces turgidiscabies                        |                   |             | 440276217 | 440276216 |
| 245461 | Frankia sp. EUN1f                                  |                   |             | 288352379 | 288352380 |
| 245525 | Frankia sp. EUN1f                                  |                   |             | 288350346 | 288350347 |
| 246658 | Streptomyces auratus                               |                   |             | 396997410 | 396997409 |
| 246748 | Streptomyces auratus                               |                   |             | 396993109 | 396993110 |
| 253584 | Amycolatopsis decaplanina                          |                   |             | 452952207 | 452952208 |
| 257598 | Streptomyces sp. C                                 |                   |             | 302441586 | 302441587 |
| 257759 | Streptomyces sp. C                                 |                   |             | 302448244 | 302448245 |
| 257760 | Streptomyces sp. C                                 |                   |             | 302448272 | 302448273 |
| 259648 | Streptomyces sviveus                               |                   |             | 197711929 | 197711928 |
| 259749 | Streptomyces coelicoflavus                         |                   |             | 371551784 | 371551785 |
| 260674 | Actinoplanes sp. N902-109                          |                   |             | 494685525 | 494685524 |
| 261168 | Streptomyces sp. W007                              |                   |             | 364006457 | 364006458 |
| 261395 | Micromonospora lupini                              |                   |             | 385884259 | 385884258 |
| 261776 | Streptomyces zinciresistens                        |                   |             | 345639059 | 345639058 |
| 261818 | Streptomyces zinciresistens                        |                   |             | 345637421 | 345637420 |
| 262236 | Frankia sp. CN3                                    |                   |             | 357077380 | 357077379 |
| 268606 | Ktedonobacter racemifer                            |                   |             | 297547788 | 297547789 |
| 280551 | Streptomyces sp. Mg1                               |                   |             | 194344319 | 194344318 |
| 280703 | Streptomyces sp. SPB74                             |                   |             | 197695599 | 197695598 |
| 295708 | Streptomyces himastatinicus                        |                   |             | 302459209 | 302459210 |
| 295719 | Streptomyces himastatinicus                        |                   |             | 302459575 | 302459574 |
| 296212 | Frankia sp. QA3                                    |                   |             | 392285106 | 392285107 |
| 296285 | Frankia sp. QA3                                    |                   |             | 392287527 | 392287528 |
| 296361 | Frankia sp. QA3                                    |                   |             | 392290229 | 392290230 |
| 300625 | Streptomyces chartreusis                           |                   |             | 497734383 | 497734384 |
| 305098 | Streptomyces acidiscabies                          |                   |             | 498039595 | 498039594 |
| 305257 | Streptomyces acidiscabies                          |                   |             | 498045513 | 498045514 |
| 305264 | Streptomyces acidiscabies                          |                   |             | 498045777 | 498045775 |
| 321155 | Lachnospiraceae bacterium 3-1                      |                   |             | 507762612 | 507762611 |
| 323979 | Streptomyces sp. HGB0020                           |                   |             | 512062730 | 512062729 |
| 324023 | Streptomyces sp. HGB0020                           |                   |             | 512060372 | 512060371 |
| 325070 | Streptomyces sp. PHH0547                           |                   |             | 512153434 | 512153433 |
| 327338 | Streptomyces lusitanus                             | grincamycin       | acetyl-9    | 514389165 | 514389166 |
| 327763 | Streptomyces albulus                               |                   |             | 508092873 | 508092874 |
| 327785 | Streptomyces albulus                               |                   |             | 508092166 | 508092165 |
| 329325 | Streptomyces aurantiacus                           |                   |             | 514332066 | 514332067 |
| 330182 | Actinoalloteichus spitiensis                       |                   |             | 515067606 | 515067605 |
| 333371 | Streptomyces sulphureus                            |                   |             | 515467828 | 515467830 |

|        |                                |                   |               |           |           |
|--------|--------------------------------|-------------------|---------------|-----------|-----------|
| 333481 | Streptomyces sulphureus        |                   |               | 515471814 | 515471813 |
| 338703 | Streptomyces sp. SS            |                   |               | 515806529 | 515806528 |
| 338710 | Streptomyces sp. SS            |                   |               | 515806720 | 515806721 |
| 343954 | Nocardioopsis alba             |                   |               | 516103130 | 516103129 |
| 344047 | Nocardioopsis halophila        |                   |               | 516106461 | 516106460 |
| 344192 | Nocardioopsis prasina          |                   |               | 516112287 | 516112286 |
| 344638 | Nocardioopsis synnemataformans |                   |               | 516133090 | 516133089 |
| 344744 | Nocardioopsis synnemataformans |                   |               | 516136652 | 516136651 |
| 344838 | Nocardioopsis halotolerans     |                   |               | 516140432 | 516140433 |
| 344901 | Nocardioopsis halotolerans     |                   |               | 516143136 | 516143135 |
| 345039 | Nocardioopsis valliformis      |                   |               | 516148637 | 516148638 |
| 345285 | Nocardioopsis ganjiahuensis    |                   |               | 516162729 | 516162731 |
| 345298 | Nocardioopsis ganjiahuensis    |                   |               | 516163860 | 516163858 |
| 345500 | Nocardioopsis potens           |                   |               | 516177487 | 516177485 |
| 345691 | Nocardioopsis alkaliphila      |                   |               | 516194141 | 516194140 |
| 354385 | Streptomyces sp. FxanaC1       |                   |               | 516769011 | 516769013 |
| 354662 | Streptomyces                   |                   |               | 516790530 | 516790531 |
| 354667 | Streptomyces                   |                   |               | 516790775 | 516790772 |
| 354765 | Streptomyces                   |                   |               | 516797526 | 516797524 |
| 359878 | Streptomyces vitaminophilus    |                   |               | 517194301 | 517194300 |
| 362034 | Streptomyces sp. CcaIMP-8W     |                   |               | 517298639 | 517298640 |
| 362071 | Streptomyces sp. CcaIMP-8W     |                   |               | 517300121 | 517300122 |
| 362751 | Frankia sp. BCU110501          |                   |               | 517330197 | 517330198 |
| 363206 | Streptomyces                   |                   |               | 517349015 | 517349014 |
| 363377 | Streptomyces sp. HmicA12       |                   |               | 517356095 | 517356094 |
| 363616 | Streptomyces sp. MspMP-M5      |                   |               | 517364723 | 517364724 |
| 363634 | Streptomyces sp. MspMP-M5      |                   |               | 517365652 | 517365653 |
| 363678 | Streptomyces sp. MspMP-M5      |                   |               | 517367650 | 517367649 |
| 363805 | Streptomyces sp. LaPpAH-108    |                   |               | 517372962 | 517372963 |
| 363824 | Streptomyces sp. LaPpAH-108    |                   |               | 517373726 | 517373725 |
| 363894 | Streptomyces sp. ATeXAB-D23    |                   |               | 517376190 | 517376191 |
| 364010 | Streptomyces sp. ATeXAB-D23    |                   |               | 517380234 | 517380233 |
| 364083 | Streptomyces sp. BoleA5        |                   |               | 517382660 | 517382661 |
| 364264 | Streptomyces sp. BoleA5        |                   |               | 517389779 | 517389778 |
| 364368 | Streptomyces sp. PsTaAH-124    |                   |               | 517393575 | 517393576 |
| 365742 | Frankia sp. BMG5.12            |                   |               | 517467538 | 517467539 |
| 366519 | Actinokineospora enzanensis    |                   |               | 517511338 | 517511339 |
| 366522 | Actinokineospora enzanensis    |                   |               | 517511425 | 517511424 |
| 366523 | Actinokineospora enzanensis    |                   |               | 517511485 | 517511486 |
| 366530 | Actinokineospora enzanensis    |                   |               | 517511634 | 517511633 |
| 366587 | Actinokineospora enzanensis    |                   |               | 517513802 | 517513801 |
| 367271 | Salinispora pacifica           |                   |               | 517549947 | 517549948 |
| 367321 | Salinispora pacifica           |                   |               | 517552055 | 517552054 |
| 367380 | Salinispora pacifica           |                   |               | 517554571 | 517554572 |
| 367531 | Salinispora pacifica           |                   |               | 517560266 | 517560265 |
| 367614 | Salinispora pacifica           |                   |               | 517563182 | 517563181 |
| 367702 | Salinispora pacifica           |                   |               | 517566341 | 517566340 |
| 367758 | Salinispora pacifica           |                   |               | 517568116 | 517568115 |
| 367938 | Salinispora pacifica           |                   |               | 517574884 | 517574885 |
| 367951 | Salinispora pacifica           |                   |               | 517575473 | 517575472 |
| 368772 | Micromonospora sp. CNB394      |                   |               | 517613873 | 517613874 |
| 368863 | Micromonospora sp. CNB394      |                   |               | 517617890 | 517617891 |
| 369056 | Salinispora arenicola          |                   |               | 517624668 | 517624667 |
| 369191 | Salinispora arenicola          |                   |               | 517629449 | 517629450 |
| 369636 | Salinispora pacifica           |                   |               | 517644688 | 517644689 |
| 369704 | Salinispora pacifica           |                   |               | 517647314 | 517647315 |
| 369787 | Salinispora pacifica           |                   |               | 517650873 | 517650874 |
| 369860 | Salinispora pacifica           |                   |               | 517653383 | 517653382 |
| 369866 | Salinispora pacifica           |                   |               | 517653809 | 517653808 |
| 370481 | Streptomyces sp. CNT372        |                   |               | 517676353 | 517676354 |
| 372859 | Streptomyces sp. CNB091        |                   |               | 517789797 | 517789796 |
| 374795 | Streptomyces prunicolor        |                   |               | 517891591 | 517891590 |
| 375049 | Streptomyces sp. R1-NS-10      |                   |               | 517900262 | 517900263 |
| 378368 | Streptomyces sp. TOR3209       |                   |               | 518156679 | 518156680 |
| 378814 | Streptomyces sp. AA1529        |                   |               | 518188243 | 518188242 |
| 378859 | Streptomyces sp. AA1529        |                   |               | 518189500 | 518189499 |
| 380280 | Streptomyces sp. AA0539        |                   |               | 518262143 | 518262142 |
| 382025 | Streptomyces sp. FxanaD5       |                   |               | 518354660 | 518354659 |
| 382069 | Streptomyces sp. FxanaD5       |                   |               | 518356686 | 518356687 |
| 382409 | Streptomyces sulphureus        |                   |               | 518373928 | 518373929 |
| 382423 | Streptomyces sulphureus        |                   |               | 518374555 | 518374554 |
| 382559 | Streptomyces sulphureus        |                   |               | 518379252 | 518379251 |
| 384287 | Actinomadura atramentaria      |                   |               | 518464803 | 518464802 |
| 393483 | Streptomyces canus             |                   |               | 518960103 | 518960102 |
| 393582 | Streptomyces canus             |                   |               | 518963441 | 518963442 |
| 393751 | Streptomyces sp. 303MFC05.2    |                   |               | 518969878 | 518969877 |
| 393912 | Streptomyces sp. 303MFC05.2    |                   |               | 518975094 | 518975095 |
| 393952 | Streptomyces sp. 303MFC05.2    |                   |               | 518976223 | 518976224 |
| 394009 | Streptomyces sp. 351MFTsu5.1   |                   |               | 518978505 | 518978504 |
| 394196 | Streptomyces sp. 351MFTsu5.1   |                   |               | 518985500 | 518985501 |
| 396493 | Streptomyces afghaniensis      |                   |               | 514936636 | 514936635 |
| 400423 | Scissionella marina            |                   |               | 521986047 | 521986046 |
| 401818 | Streptomyces scabrisporus      |                   |               | 522042542 | 522042543 |
| 421616 | Streptomyces collinus Tu 365   |                   |               | 529225472 | 529225473 |
| 421635 | Streptomyces collinus Tu 365   |                   |               | 529226334 | 529226333 |
| o1     | Streptomyces griseus           | fredericamycin    | hexadienyl-12 | 33327096  | 33327097  |
| o2     | Streptomyces violaceoruber     | granaticin        | acetyl-7      | 4218564   | 4218565   |
| o3     | Streptomyces glaucescens       | tetracenymin      | acetyl-9      | 153496    | 153497    |
| o4     | Streptomyces olindensis        | cosmomycin        | propionyl-9   | 83272129  | 83272131  |
| o5     | Streptomyces halstedii         | Sch spore pigment | acetyl-11     | 153323    | 153324    |
| o6     | Streptomyces griseus           | griseusin         | acetyl-9      | 581665    | 581666    |
