# Supplementary material for: Expanding our Understanding of Sequence-Function Relationships of Type II Polyketide Biosynthetic Gene Clusters: Bioinformatics-Guided Identification of Frankiamicin A from Frankia sp. EAN1pec
Source: PubMed Central journal article supplement (PMC4383371; doi:10.1371/journal.pone.0121505), 2015-04-02
Supplement: pone.0121505.s010.pdf [file pone.0121505.s010.pdf]

Table S2. List of type I polyketide, type II polyketide, and non-ribosomal peptide natural product gene clusters identified in *Frankia* genomes using *Dynamite* software. Type II polyketide clusters are in bold, and those within the diverged clade examined in this study are labelled with 3 asterisk in the “cluster type” column.

| Organism                     | Cluster # | Gene cluster protein ID range |                  | Cluster type      |
|------------------------------|-----------|-------------------------------|------------------|-------------------|
|                              |           | First protein                 | Last protein     |                   |
| Frankia alni ACN14a          | 1         | 111219827                     | 111219853        | cis-AT_PKS-I      |
| Frankia alni ACN14a          | 2         | 111220746                     | 111220752        | cis-AT_PKS-I      |
| Frankia alni ACN14a          | 3         | 111220995                     | 111221007        | cis-AT_PKS-I      |
| Frankia alni ACN14a          | 4         | 111221105                     | 111221124        | cis-AT_PKS-I      |
| Frankia alni ACN14a          | 5         | 111221959                     | 111221990        | cis-AT_PKS-I NRPS |
| Frankia alni ACN14a          | 6         | 111222328                     | 111222337        | cis-AT_PKS-I      |
| Frankia alni ACN14a          | 7         | 111222397                     | 111222407        | cis-AT_PKS-I      |
| Frankia alni ACN14a          | 8         | 111222599                     | 111222615        | cis-AT_PKS-I      |
| Frankia alni ACN14a          | 9         | 111222836                     | 111222874        | cis-AT_PKS-I      |
| Frankia alni ACN14a          | 10        | 111223473                     | 111223488        | cis-AT_PKS-I      |
| Frankia alni ACN14a          | 11        | 111223558                     | 111223561        | NRPS              |
| Frankia alni ACN14a          | 12        | 111223568                     | 111223571        | NRPS              |
| <b>Frankia alni ACN14a</b>   | <b>13</b> | <b>111223775</b>              | <b>111223796</b> | <b>PKS-II ***</b> |
| Frankia sp. BCU110501        | 1         | 517315950                     | 517315964        | cis-AT_PKS-I      |
| Frankia sp. BCU110501        | 2         | 517318311                     | 517318315        | cis-AT_PKS-I      |
| Frankia sp. BCU110501        | 3         | 517318392                     | 517318395        | cis-AT_PKS-I      |
| Frankia sp. BCU110501        | 4         | 517320080                     | 517320097        | cis-AT_PKS-I      |
| Frankia sp. BCU110501        | 5         | 517321349                     | 517321351        | cis-AT_PKS-I      |
| Frankia sp. BCU110501        | 6         | 517321360                     | 517321360        | trans-AT_PKS-I    |
| Frankia sp. BCU110501        | 7         | 517321369                     | 517321369        | cis-AT_PKS-I      |
| Frankia sp. BCU110501        | 8         | 517321380                     | 517321416        | cis-AT_PKS-I      |
| Frankia sp. BCU110501        | 9         | 517321456                     | 517321482        | cis-AT_PKS-I      |
| Frankia sp. BCU110501        | 10        | 517322903                     | 517322915        | cis-AT_PKS-I      |
| Frankia sp. BCU110501        | 11        | 517326987                     | 517327012        | cis-AT_PKS-I      |
| Frankia sp. BCU110501        | 12        | 517327259                     | 517327270        | cis-AT_PKS-I      |
| Frankia sp. BCU110501        | 13        | 517327292                     | 517327301        | cis-AT_PKS-I      |
| Frankia sp. BCU110501        | 14        | 517329256                     | 517329256        | NRPS              |
| Frankia sp. BCU110501        | 15        | 517329264                     | 517329282        | cis-AT_PKS-I      |
| <b>Frankia sp. BCU110501</b> | <b>16</b> | <b>517330195</b>              | <b>517330199</b> | <b>PKS-II ***</b> |
| Frankia sp. BCU110501        | 17        | 517330237                     | 517330238        | cis-AT_PKS-I      |
| Frankia sp. BCU110501        | 18        | 517330542                     | 517330555        | cis-AT_PKS-I      |
| Frankia sp. BCU110501        | 19        | 517330874                     | 517330877        | cis-AT_PKS-I      |
| Frankia sp. BCU110501        | 20        | 522061021                     | 522061026        | cis-AT_PKS-I      |
| Frankia sp. BCU110501        | 21        | 522061077                     | 522061102        | cis-AT_PKS-I      |
| Frankia sp. BCU110501        | 22        | 522061305                     | 522061310        | cis-AT_PKS-I      |
| Frankia sp. BCU110501        | 23        | 522061453                     | 522061455        | NRPS              |
| Frankia sp. BMG5.12          | 1         | 517464459                     | 517464497        | cis-AT_PKS-I      |
| Frankia sp. BMG5.12          | 2         | 517464551                     | 517464551        | cis-AT_PKS-I      |
| Frankia sp. BMG5.12          | 3         | 517464741                     | 517464750        | trans-AT_PKS-I    |
| Frankia sp. BMG5.12          | 4         | 517466209                     | 517466232        | cis-AT_PKS-I      |
| Frankia sp. BMG5.12          | 5         | 517466408                     | 517466427        | cis-AT_PKS-I      |
| Frankia sp. BMG5.12          | 6         | 517467058                     | 517467067        | NRPS              |
| <b>Frankia sp. BMG5.12</b>   | <b>7</b>  | <b>517467530</b>              | <b>517467551</b> | <b>PKS-II ***</b> |
| Frankia sp. BMG5.12          | 8         | 517467647                     | 517467666        | cis-AT_PKS-I      |
| Frankia sp. BMG5.12          | 9         | 517468621                     | 517468636        | cis-AT_PKS-I      |

|                            |           |                  |                  |                   |
|----------------------------|-----------|------------------|------------------|-------------------|
| Frankia sp. BMG5.12        | 10        | 517468646        | 517468661        | cis-AT_PKS-I      |
| Frankia sp. BMG5.12        | 11        | 517468751        | 517468764        | cis-AT_PKS-I      |
| Frankia sp. BMG5.12        | 12        | 517468895        | 517468903        | NRPS              |
| Frankia sp. BMG5.12        | 13        | 517469047        | 517469051        | cis-AT_PKS-I      |
| Frankia sp. BMG5.12        | 14        | 517469097        | 517469112        | cis-AT_PKS-I      |
| Frankia sp. BMG5.12        | 15        | 517469399        | 517469441        | cis-AT_PKS-I      |
| Frankia sp. BMG5.12        | 16        | 517469491        | 517469491        | cis-AT_PKS-I      |
| Frankia sp. BMG5.12        | 17        | 517469742        | 517469761        | cis-AT_PKS-I      |
| Frankia sp. BMG5.12        | 18        | 517469815        | 517469815        | cis-AT_PKS-I      |
| Frankia sp. Ccl3           | 1         | 86566498         | 86566505         | cis-AT_PKS-I      |
| Frankia sp. Ccl3           | 2         | 86566562         | 86566566         | cis-AT_PKS-I      |
| Frankia sp. Ccl3           | 3         | 86567541         | 86567543         | cis-AT_PKS-I NRPS |
| Frankia sp. Ccl3           | 4         | 86568008         | 86568019         | NRPS              |
| Frankia sp. Ccl3           | 5         | 86568473         | 86568480         | cis-AT_PKS-I      |
| Frankia sp. Ccl3           | 6         | 86568529         | 86568538         | cis-AT_PKS-I      |
| Frankia sp. Ccl3           | 7         | 86739636         | 86739643         | cis-AT_PKS-I      |
| Frankia sp. Ccl3           | 8         | 86739700         | 86739704         | cis-AT_PKS-I      |
| Frankia sp. Ccl3           | 9         | 86740679         | 86740681         | cis-AT_PKS-I NRPS |
| Frankia sp. Ccl3           | 10        | 86741146         | 86741157         | NRPS              |
| <b>Frankia sp. Ccl3</b>    | <b>11</b> | <b>86741535</b>  | <b>86741560</b>  | <b>PKS-II ***</b> |
| Frankia sp. Ccl3           | 12        | 86741611         | 86741618         | cis-AT_PKS-I      |
| Frankia sp. Ccl3           | 13        | 86741667         | 86741676         | cis-AT_PKS-I      |
| <b>Frankia sp. Ccl3</b>    | <b>14</b> | <b>86742770</b>  | <b>86742782</b>  | <b>PKS-II</b>     |
| Frankia sp. CN3            | 1         | 357070389        | 357070391        | cis-AT_PKS-I      |
| Frankia sp. CN3            | 2         | 357072034        | 357072039        | cis-AT_PKS-I      |
| Frankia sp. CN3            | 3         | 357076122        | 357076130        | cis-AT_PKS-I      |
| Frankia sp. CN3            | 4         | 357076290        | 357076301        | cis-AT_PKS-I      |
| <b>Frankia sp. CN3</b>     | <b>5</b>  | <b>357077366</b> | <b>357077423</b> | <b>PKS-II ***</b> |
| Frankia sp. CN3            | 6         | 357077906        | 357077910        | cis-AT_PKS-I      |
| Frankia sp. CN3            | 7         | 357078885        | 357078885        | NRPS              |
| Frankia sp. CN3            | 8         | 357080303        | 357080323        | NRPS              |
| Frankia sp. CN3            | 9         | 357080338        | 357080369        | NRPS              |
| Frankia sp. CN3            | 10        | 357081620        | 357081629        | cis-AT_PKS-I      |
| <b>Frankia sp. EAN1pec</b> | <b>1</b>  | <b>158314214</b> | <b>158314227</b> | <b>PKS-II ***</b> |
| Frankia sp. EAN1pec        | 2         | 158314861        | 158314873        | NRPS              |
| Frankia sp. EAN1pec        | 3         | 158314895        | 158314896        | cis-AT_PKS-I      |
| Frankia sp. EAN1pec        | 4         | 158315159        | 158315199        | cis-AT_PKS-I      |
| Frankia sp. EAN1pec        | 5         | 158315264        | 158315282        | cis-AT_PKS-I      |
| Frankia sp. EAN1pec        | 6         | 158315408        | 158315418        | cis-AT_PKS-I      |
| Frankia sp. EAN1pec        | 7         | 158315653        | 158315678        | cis-AT_PKS-I      |
| Frankia sp. EAN1pec        | 8         | 158315715        | 158315756        | cis-AT_PKS-I      |
| Frankia sp. EAN1pec        | 9         | 158316046        | 158316050        | cis-AT_PKS-I      |
| Frankia sp. EAN1pec        | 10        | 158316591        | 158316614        | cis-AT_PKS-I      |
| Frankia sp. EAN1pec        | 11        | 158317359        | 158317367        | cis-AT_PKS-I      |
| Frankia sp. EAN1pec        | 12        | 158317499        | 158317526        | cis-AT_PKS-I      |
| Frankia sp. EAN1pec        | 13        | 158317682        | 158317684        | NRPS              |
| Frankia sp. Eul1c          | 1         | 312195087        | 312195107        | cis-AT_PKS-I      |
| <b>Frankia sp. Eul1c</b>   | <b>2</b>  | <b>312195185</b> | <b>312195226</b> | <b>PKS-II</b>     |
| Frankia sp. Eul1c          | 3         | 312195425        | 312195429        | cis-AT_PKS-I      |
| Frankia sp. Eul1c          | 4         | 312196910        | 312196923        | cis-AT_PKS-I      |
| Frankia sp. Eul1c          | 5         | 312197187        | 312197202        | cis-AT_PKS-I      |

|                                              |           |                  |                  |                             |
|----------------------------------------------|-----------|------------------|------------------|-----------------------------|
| Frankia sp. Eu1c                             | 6         | 312198053        | 312198079        | cis-AT_PKS-I                |
| Frankia sp. Eu1c                             | 7         | 312198185        | 312198244        | cis-AT_PKS-I                |
| Frankia sp. Eu1c                             | 8         | 312198325        | 312198337        | NRPS                        |
| <b>Frankia sp. Eu1c</b>                      | <b>9</b>  | <b>312198547</b> | <b>312198562</b> | <b>PKS-II ***</b>           |
| Frankia sp. EUN1f                            | 1         | 288344572        | 288344577        | cis-AT_PKS-I                |
| Frankia sp. EUN1f                            | 2         | 288344923        | 288344924        | cis-AT_PKS-I                |
| Frankia sp. EUN1f                            | 3         | 288345064        | 288345067        | cis-AT_PKS-I                |
| Frankia sp. EUN1f                            | 4         | 288345844        | 288345845        | NRPS                        |
| Frankia sp. EUN1f                            | 5         | 288346520        | 288346540        | cis-AT_PKS-I                |
| Frankia sp. EUN1f                            | 6         | 288346877        | 288346877        | cis-AT_PKS-I                |
| Frankia sp. EUN1f                            | 7         | 288346991        | 288346996        | cis-AT_PKS-I                |
| Frankia sp. EUN1f                            | 8         | 288348482        | 288348511        | cis-AT_PKS-I                |
| Frankia sp. EUN1f                            | 9         | 288349214        | 288349220        | cis-AT_PKS-I                |
| Frankia sp. EUN1f                            | 10        | 288349375        | 288349390        | cis-AT_PKS-I trans-AT_PKS-I |
| Frankia sp. EUN1f                            | 11        | 288349805        | 288349811        | trans-AT_PKS-I              |
| Frankia sp. EUN1f                            | 12        | 288349955        | 288349966        | NRPS                        |
| Frankia sp. EUN1f                            | 13        | 288350085        | 288350089        | cis-AT_PKS-I                |
| <b>Frankia sp. EUN1f</b>                     | <b>14</b> | <b>288350336</b> | <b>288350354</b> | <b>PKS-II</b>               |
| <b>Frankia sp. EUN1f</b>                     | <b>15</b> | <b>288352340</b> | <b>288352390</b> | <b>PKS-II***</b>            |
| Frankia sp. QA3                              | 1         | 392285059        | 392285062        | NRPS                        |
| <b>Frankia sp. QA3</b>                       | <b>2</b>  | <b>392285094</b> | <b>392285116</b> | <b>PKS-II ***</b>           |
| Frankia sp. QA3                              | 3         | 392285611        | 392285635        | cis-AT_PKS-I                |
| Frankia sp. QA3                              | 4         | 392285841        | 392285872        | cis-AT_PKS-I                |
| Frankia sp. QA3                              | 5         | 392286572        | 392286584        | NRPS                        |
| <b>Frankia sp. QA3</b>                       | <b>6</b>  | <b>392287513</b> | <b>392287543</b> | <b>PKS-II</b>               |
| Frankia sp. QA3                              | 7         | 392287695        | 392287706        | cis-AT_PKS-I                |
| Frankia sp. QA3                              | 8         | 392287915        | 392287921        | cis-AT_PKS-I                |
| Frankia sp. QA3                              | 9         | 392288746        | 392288770        | cis-AT_PKS-I                |
| <b>Frankia sp. QA3</b>                       | <b>10</b> | <b>392290227</b> | <b>392290257</b> | <b>PKS-II</b>               |
| Frankia symbiont of Datisca glomerata        | 1         | 336176511        | 336176516        | cis-AT_PKS-I                |
| <b>Frankia symbiont of Datisca glomerata</b> | <b>2</b>  | <b>336176578</b> | <b>336176596</b> | <b>PKS-II</b>               |
| Frankia symbiont of Datisca glomerata        | 3         | 336177342        | 336177348        | cis-AT_PKS-I                |
| Frankia symbiont of Datisca glomerata        | 4         | 336177905        | 336177938        | cis-AT_PKS-I                |
| <b>Frankia symbiont of Datisca glomerata</b> | <b>5</b>  | <b>336178258</b> | <b>336178279</b> | <b>PKS-II ***</b>           |
| Frankia symbiont of Datisca glomerata        | 6         | 336178515        | 336178538        | cis-AT_PKS-I                |
| <b>Frankia symbiont of Datisca glomerata</b> | <b>7</b>  | <b>336178649</b> | <b>336178662</b> | <b>PKS-II ***</b>           |
| Frankia symbiont of Datisca glomerata        | 8         | 336178763        | 336178784        | cis-AT_PKS-I                |
