# Supplementary material for: Expanding our Understanding of Sequence-Function Relationships of Type II Polyketide Biosynthetic Gene Clusters: Bioinformatics-Guided Identification of Frankiamicin A from Frankia sp. EAN1pec
Source: PubMed Central journal article supplement (PMC4383371; doi:10.1371/journal.pone.0121505), 2015-04-02
Supplement: pone.0121505.s011.pdf [file pone.0121505.s011.pdf]

Table S3. Information on the *Frankia* genomes analyzed as part of this study.

| <b>Organism/Name</b>                                | <b>Accession #</b> | <b>WGS</b> | <b># of Scaffolds</b> | <b># of Genes</b> | <b># of Proteins</b> | <b>Release Date</b> | <b>Status</b> |
|-----------------------------------------------------|--------------------|------------|-----------------------|-------------------|----------------------|---------------------|---------------|
| <i>Frankia alni</i> ACN14a                          | NC_008278.1        | -          | 1                     | 6775              | 6700                 | 8/3/2006            | Complete      |
| <i>Frankia</i> sp. BCU110501                        | -                  | ARDT01     | 194                   | 6047              | 5880                 | 4/19/2013           | Scaffold      |
| <i>Frankia</i> sp. BMG5.12                          | -                  | ARFH01     | 135                   | 5473              | 5340                 | 4/19/2013           | Scaffold      |
| <i>Frankia</i> sp. Ccl3                             | NC_007777.1        | -          | 1                     | 4618              | 4499                 | 2/6/2006            | Complete      |
| <i>Frankia</i> sp. CN3                              | -                  | AGJN02     | 2                     | 7173              | 7024                 | 11/15/2011          | Scaffold      |
| <i>Frankia</i> sp. EAN1pec                          | NC_009921.1        | -          | 1                     | 7377              | 7191                 | 10/10/2007          | Complete      |
| <i>Frankia</i> sp. Eu1c                             | NC_014666.1        | -          | 1                     | 7263              | 7083                 | 11/5/2010           | Complete      |
| <i>Frankia</i> sp. EUN1f                            | -                  | ADGX01     | 396                   | 8236              | 8182                 | 2/4/2010            | Contig        |
| <i>Frankia</i> sp. QA3                              | NZ_CM001489.1      | AJWA01     | 1                     | 6546              | 6033                 | 5/8/2012            | Chromosome    |
| <i>Frankia</i> symbiont of <i>Datisca glomerata</i> | NC_015656.1        | -          | 3                     | 4597              | 4215                 | 6/6/2011            | Complete      |
