# Supplementary material for: Expanding our Understanding of Sequence-Function Relationships of Type II Polyketide Biosynthetic Gene Clusters: Bioinformatics-Guided Identification of Frankiamicin A from Frankia sp. EAN1pec
Source: PubMed Central journal article supplement (PMC4383371; doi:10.1371/journal.pone.0121505), 2015-04-02
Supplement: pone.0121505.s012.pdf [file pone.0121505.s012.pdf]

**Table S4.** Comparative genomic summary of *Frankia* type II polyketide gene cluster biosynthetic proteins and their homologues in pentangular and tetracenomycin training set clusters.

| product              | species                                                      | KS $\alpha$        | KS $\beta$         | ACPex, ACPp        | AroCycN2           | Cyc2               | Cyc1               | ABMh               | ABMi               | KR                        |
|----------------------|--------------------------------------------------------------|--------------------|--------------------|--------------------|--------------------|--------------------|--------------------|--------------------|--------------------|---------------------------|
| frankiamicin         | <i>Frankia</i> sp. EAN1pec                                   | FranEAN1_2393      | FranEAN1_2394      | FranEAN1_2390      | FranEAN1_2391      | FranEAN1_2392      | FranEAN1_2389      | FranEAN1_2396      | FranEAN1_2397      | FranEAN1_2395             |
| frankiamicin         | <i>Frankia</i> sp. Cci3                                      | Francci3_2851      | Francci3_2850      | Francci3_2854      | Francci3_2853      | Francci3_2852      | Francci3_2855      | Francci3_2848      | Francci3_2847      | Francci3_2849             |
| frankiamicin         | <i>Frankia</i> alni ACN14a                                   | FRAAL4387          | FRAAL4386          | FRAAL4390          | FRAAL4389          | FRAAL4388          | FRAAL4392          | FRAAL4384          | FRAAL4383          | FRAAL4385                 |
| frankiamicin         | <i>Frankia</i> sp. Eul1c                                     | FraEul1c_4753      | FraEul1c_4752      | FraEul1c_4756      | FraEul1c_4755      | FraEul1c_4754      | FraEul1c_4757      | FraEul1c_4750      | FraEul1c_4749      | FraEul1c_4751             |
| frankiamicin         | <i>Frankia</i> sp. EUN1f                                     | FrEUN1f DRAFT_0261 | FrEUN1f DRAFT_0262 | FrEUN1f DRAFT_0258 | FrEUN1f DRAFT_0259 | FrEUN1f DRAFT_0260 | FrEUN1f DRAFT_0257 | FrEUN1f DRAFT_0264 | FrEUN1f DRAFT_0265 | FrEUN1f DRAFT_0263        |
| pradimicin           | <i>Actinomadura</i> hibisca                                  | pdmA               | pdmB               | pdmC               | pdmD               | pdmL               | pdmK               | pdmH               | pdmI               | pdmG                      |
| rubromycin           | <i>Streptomyces</i> collinus                                 | rubA               | rubB               | rubC               | rubF (N-terminal)  | rubD               | rubE               | rubH               | rubT               | rubG                      |
| griseorhodin         | <i>Streptomyces</i> sp. JP95                                 | grhA               | grhB               | grhC               | grhT (N-terminal)  | grhS               | grhQ               | grhU               | grhV               | grhO10, grhT (C-terminal) |
| fredericamycin       | <i>Streptomyces</i> griseus                                  | fdmF               | fdmG               | fdmH               | fdmI               | fdmE               | fdmD               | fdmP, fdmJ         | fdmQ               | fdmO                      |
| benastatin           | <i>Streptomyces</i> sp. A2991200                             | benA               | benB               | benC               | benH (N-terminal)  | benD               | benE               | benH               | benJ               | benL                      |
| lysolipin            | <i>Streptomyces</i> tendae                                   | llpF               | llpE               | llpD               | llpCI              | llpCII             | llpCIII            | llpOIII            | llpOII             | llpZI, llpZII             |
| A-74528              | <i>Streptomyces</i> sp. SANK 61196                           | sanF               | sanG               | sanH               | sanI               | sanE               | sanD               | sanP, sanJ         | sanQ               | sanO                      |
| TLN-05220, TLN-05223 | <i>Micromonospora echinospora</i> subsp. <i>challisensis</i> | TLN-ORF18          | TLN-ORF19          | TLN-ORF20          | TLN-ORF21          | TLN-ORF17          | TLN-ORF16          | TLN-ORF23          | TLN-ORF24          | TLN-ORF22, TLN-ORF14      |
| FD-594               | <i>Streptomyces</i> sp. TA-0256                              | pnxA               | pnxB               | pnxC, pnxV         | pnxD               | pnxL               | pnxK               | pnxH               | pnxI               | pnxG, pnxW                |
| xantholipin          | <i>Streptomyces</i> flavogriseus                             | xanF               | xanE               | xanD               | xanC1              | xanC2              | xanC3              | xanO7              | xanO6              | xanZ3, xanZ4              |
| arixanthomycins      | Uncultured bacterium                                         | arx16              | arx17              | arx18              | arx19              | arx15              | arx14              | arx22              | arx23              | arx21, arx27              |
| fasamycin (AZ154)    | Uncultured bacterium                                         | ORF23              | ORF22              | ORF21              | ORF20, ORF30       | ORF24              | ORF19              | ORF15*             | ORF16*             | ---                       |
| lactonamycin         | <i>Streptomyces</i> rishiriensis                             | lct31              | lct32              | lct24, lct26       | lct27              | lct30              | lct29              | lct33, lct42*      | ---                | ---                       |
| lactonamycin Z       | <i>Streptomyces</i> sanglieri                                | lcz31              | lcz32              | lcz24, lcz26       | lcz27              | lcz30              | lcz29              | lcz33*             | ---                | ---                       |
| tetracenomycin       | <i>Streptomyces</i> glaucescens                              | tcmK               | tcmL               | tcmM               | tcmN (N-terminal)  | tcmJ               | tcmI               | tcmH*              | ---                | ---                       |
| elloramycin          | <i>Streptomyces</i> olivaceus                                | elmK               | elmL               | elmM               | elmNi              | elmJ               | elmI               | elmH*              | ---                | ---                       |
